# Supplementary material for: The Cognitive and Psychiatric Subacute Impairment in severe Covid-19.
Source: Research Square preprint supplement (doi:10.21203/rs.3.rs-780220/v2), 2021-11-04
Supplement: Supplementary file 1 [file 542dc1307557a3172bce8bdc.pdf]

|                                             | N   | Average Direct Score ( $\pm$ SD)     | Maximum Score | Average Scaled Score | N (%) $\leq$ 1Z    |
|---------------------------------------------|-----|--------------------------------------|---------------|----------------------|--------------------|
| <b>BDI</b>                                  | 135 | <b>14.95 (<math>\pm</math>10.73)</b> |               |                      | <b>37 (27,40%)</b> |
| <b>STAI State</b>                           | 138 | <b>23.79 (<math>\pm</math>10.98)</b> |               |                      | <b>49 (35,56%)</b> |
| <b>STAI Trait</b>                           | 138 | <b>24.18 (<math>\pm</math>11.18)</b> |               |                      | <b>41 (29,49%)</b> |
| <b>Global MoCA score</b>                    | 131 | <b>21.95 (<math>\pm</math>5.70)</b>  | 30            | 10.86 ( $\pm$ 8.85)  | <b>33 (25.2%)</b>  |
| <b>Visuo-spatial and executive function</b> | 129 | <b>3.63 (<math>\pm</math>1.49)</b>   | 5             |                      |                    |
| <b>Animal naming</b>                        | 129 | <b>2.78 (<math>\pm</math>0.53)</b>   | 3             |                      |                    |
| <b>Attention</b>                            | 129 | <b>4.23 (<math>\pm</math>1.66)</b>   | 6             |                      |                    |
| <b>Language</b>                             | 129 | <b>2.07 (<math>\pm</math>1.10)</b>   | 3             |                      |                    |
| <b>Abstraction</b>                          | 129 | <b>1.33 (<math>\pm</math>0.70)</b>   | 2             |                      |                    |
| <b>Delayed recall</b>                       | 129 | <b>1.94 (<math>\pm</math>1.69)</b>   | 5             |                      |                    |
| <b>Orientation</b>                          | 129 | <b>5.62 (<math>\pm</math>0.92)</b>   | 6             |                      |                    |

Table 1. Results of the psychopathological assessment (BDI, Stai tests) and MoCA test scores in the global sample. Abnormal values are considered if they are equal to or less than 1 SD below the value corresponding to their standardized group by age, sex and educational level.
